# Supplementary material for: Mesalazine in the initial management of severely acutely malnourished children with environmental enteric dysfunction: a pilot randomized controlled trial
Source: Springer Nature journal article supplement (doi:10.1186/s12916-014-0133-2), 2014-08-13

○ Mesalazine  
 □ Placebo

▨ Lower limit of detection

### Faecal Calprotectin

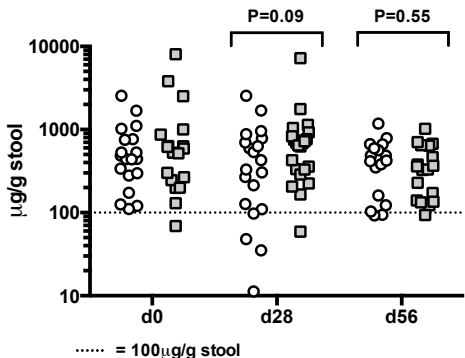

### C-Reactive Protein

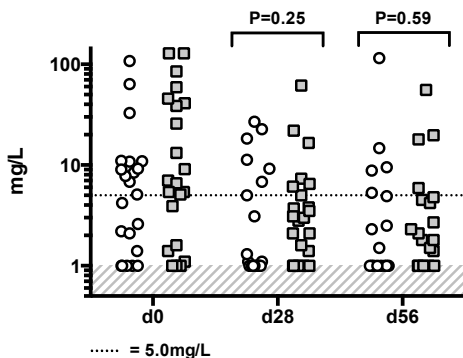

### Erythrocyte Sedimentation Rate

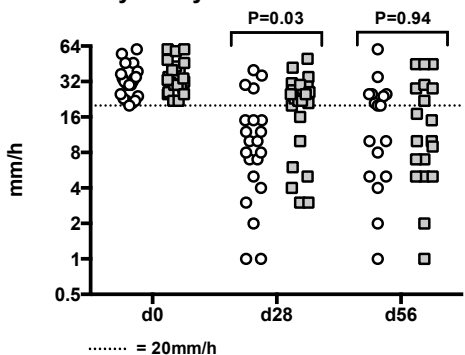

### IgG EndoCAb

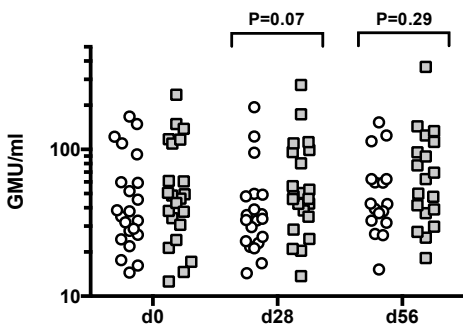

### Endotoxin

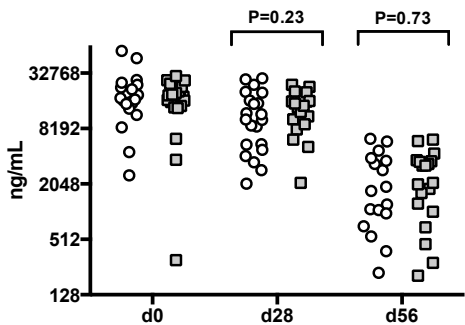

### Platelets

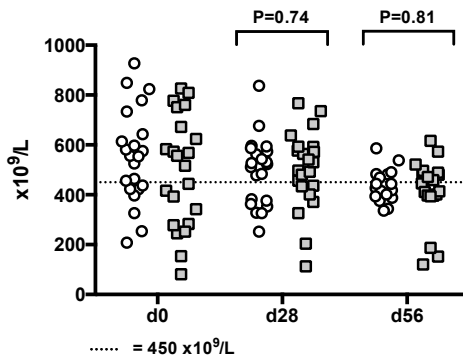

### sCD14

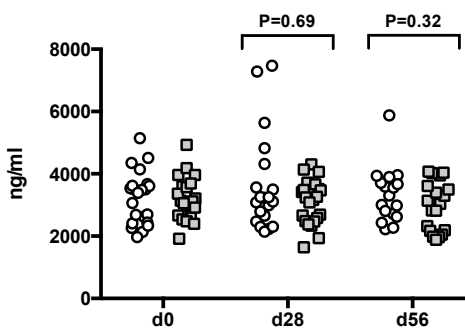

### White Cell Count

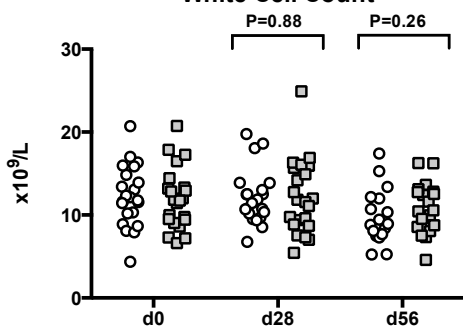

Supplement: MOESM7 [file 9758416]
